# Supplementary material
Source: PubMed Central journal article supplement (PMC1899986)
Supplement: molcellb_27_10_3651__1.pdf [file molcellb_27_10_3651__1.pdf]

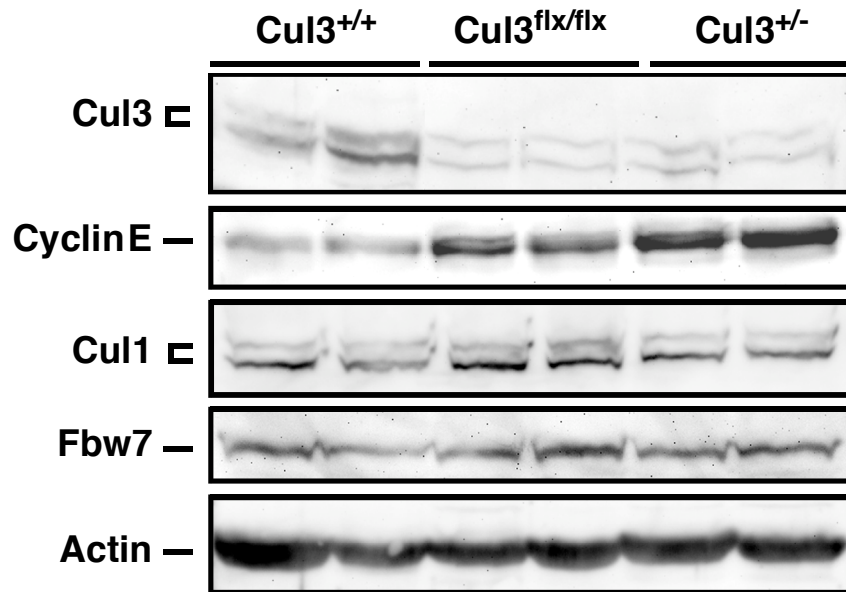

FIG. S1. Cul1 ligase steady state levels do not change in cells with low Cul3 expression. Immunoblot of endogenous Cul3 (1st panel), cyclin E (2nd panel) Cul1 (3rd panel) and Fbw7 (4th panel) in Cul3<sup>+/+</sup>, Cul3<sup>flx/flx</sup>, and Cul3<sup>+/-</sup> MEFs. Immunoblot for actin is used as a loading control (5th panel).

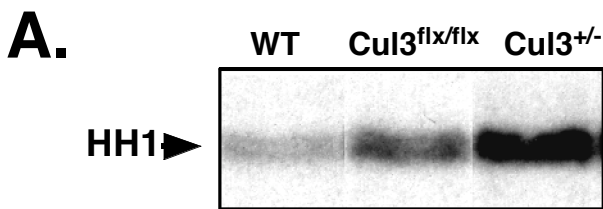

**B.**

| Genotype                | 0μm Roscovitine |                |         | 25μm Roscovitine |                |         |
|-------------------------|-----------------|----------------|---------|------------------|----------------|---------|
|                         | Total Number    | Total BrdU (+) | S-phase | Total Number     | Total BrdU (+) | S-phase |
| Cul3 <sup>+/+</sup>     | 1384            | 139            | 10%     | 397              | 6              | 1.5%    |
| Cul3 <sup>flx/flx</sup> | 1285            | 209            | 16%     | 281              | 5              | 1.8%    |
| Cul3 <sup>+/-</sup>     | 4557            | 1117           | 25%     | 849              | 18             | 2.1%    |

FIG. S2. Cul3 hypomorphs have excess cyclin E/Cdk2 kinase activity. (A) Histone H1 (HH1) was used as a substrate to monitor cyclin E directed Cdk2 kinase activity. An image of the relative phosphorylation of Histone H1 is shown: left lane-wild type cells, center lane-Cul3<sup>flx/flx</sup> and right lane-Cul3<sup>+/-</sup>. Equal cell numbers were used in these experiments; all cells are the same passage (p2) and are in log phase. This gel shows a representative experiment, similar data was obtained in three replicates. (B) Cells were treated with roscovitine and the percentage of cells in S-phase was determined by measuring BrdU incorporation. Roscovitine dramatically reduced the levels of S-phase cells in all three genotypes.
